# Supplementary material
Source: PubMed Central journal article supplement (PMC2373367)
Supplement: embor200834-s1.pdf [file embor200834-s1.pdf]

Table 1. List of hemocyte specific genes enriched  $\geq 1.5$  fold in the WT/*srp* microarray comparison.

| Gene                    | Function                                   | Localization                                            | Fold Difference |
|-------------------------|--------------------------------------------|---------------------------------------------------------|-----------------|
| CG2952 (Dox-A3)         | Melanization                               | Crystal Cells, (Tomancak et al., 2002)                  | 5.94            |
| CG5779 (Be)             | Melanization                               | Crystal Cells, (Tomancak et al., 2002)                  | 30.1            |
| CG8193                  | Melanization                               | Crystal Cells, (Tomancak et al., 2002)                  | 13.78           |
| CG9364 (Treh)           | Trehalase                                  | Crystal Cells, (Tomancak et al., 2002)                  | 1.9             |
| CG13279 (Cyt-b5-r)      | Cytochrome                                 | Crystal Cells, (Tomancak et al., 2002)                  | 5.8             |
| CG8196 (Ance-4)         | Peptidyl-dipeptidase                       | Crystal Cells, (Tomancak et al., 2002)                  | 3.31            |
| CG4183 (Hsp 26)         | Heat shock protein                         | Crystal Cells, (Tomancak et al., 2002)                  | 2.15            |
| CG10467                 | Aldose-1-epimerase                         | Crystal Cells, (Tomancak et al., 2002)                  | 1.94            |
| CG8036                  | Transketolase                              | Crystal Cells, (Tomancak et al., 2002)                  | 1.88            |
| CG5748 (Hsf)            | Transcription factor                       | Crystal Cells, (Tomancak et al., 2002)                  | 1.5             |
| CG6738                  | Metallopeptidase                           | Crystal Cells, (Tomancak et al., 2002)                  | 1.78            |
| CG17109                 | Aminoacylase                               | Crystal Cells, this work                                | 8.25            |
| CG5490 (Tl)             | Toll receptor                              | Hemocytes, (Kambris et al., 2002)                       | 1.63            |
| CG6821 (Lsp1 $\gamma$ ) | Larval serum protein                       | Hemocytes, (Tomancak et al., 2002)                      | 1.67            |
| CG5397                  | Acyltransferase                            | Hemocytes, (Tomancak et al., 2002)                      | 3.68            |
| CG12013 (PHGPx)         | Peroxidase                                 | Hemocytes, (Tomancak et al., 2002)                      | 1.73            |
| CG5992 (Adgf-A)         | Adenosine deaminase                        | Hemocytes, (Tomancak et al., 2002)                      | 1.55            |
| CG1637                  | Acid phosphatase                           | Hemocytes, (Tomancak et al., 2002)                      | 1.59            |
| CG8983                  | Protein disulfide-isomerase                | Hemocytes, (Tomancak et al., 2002)                      | 1.53            |
| CG6698 (NtR)            | Ion channel                                | Hemocytes, (Tomancak et al., 2002)                      | 7.48            |
| CG1102 (Mp1)            | Melanization                               | Hemocytes, (Irving et al., 2005)                        | 2.17            |
| CG3505                  | Melanization                               | Hemocytes, (Irving et al., 2005)                        | 2.28            |
| CG12002 (pxn)           | Extracellular matrix                       | Hemocytes, (Tomancak et al., 2002)                      | 3.32            |
| CG9280 (Glt)            | Extracellular matrix                       | Hemocytes, (Irving et al., 2005)                        | 2.95            |
| CG33103 (Ppn)           | Extracellular matrix                       | Hemocytes, (Kramerova et al., 2000)                     | 5.24            |
| CG4145 (Cg25c)          | Extracellular matrix                       | Hemocytes, (Tomancak et al., 2002)                      | 1.79            |
| CG10236 (LanA)          | Extracellular matrix                       | Hemocytes, (Irving et al., 2005)                        | 1.52            |
| CG6378 (Sparc)          | Extracellular matrix                       | Hemocytes, (Tomancak et al., 2002)                      | 1.71            |
| CG31022                 | procollagen-proline 4-dioxygenase activity | Hemocytes, (Abrams and Andrew, 2002)                    | 1.56            |
| CG4280 (crq)            | Scavenger receptor                         | Hemocytes, (Franc et al., 1996)                         | 1.82            |
| CG10391 (Cyp310a1)      | Cytochrome                                 | Hemocytes, (Tomancak et al., 2002)                      | 2.7             |
| CG12389 (Fpps)          | Farnesyl diphosphate synthase              | Hemocytes, (Milchanowski et al., 2004)                  | 1.72            |
| CG4501 (bgm)            | Long chain fatty acid CoA ligase           | Hemocytes, (Tomancak et al., 2002)                      | 2.22            |
| CG31150                 | Lipid transporter                          | Hemocytes, (Tomancak et al., 2002)                      | 2.17            |
| CG5958                  | Retinal binding                            | Hemocytes, (Tomancak et al., 2002)                      | 2.22            |
| CG8112                  | Sterol O-acyltransferase                   | Hemocytes, (Tomancak et al., 2002)                      | 1.71            |
| CG9372                  | Serine protease                            | Hemocytes, (Irving et al., 2005)                        | 1.52            |
| CG17875 (Cyp9f3psi)     | Cytochrome                                 | Hemocytes, (Tomancak et al., 2002)                      | 2.17            |
| CG6953 (fat-spondin)    | Serine type endopeptidase inhibitor        | Hemocytes, (Tomancak et al., 2002)                      | 4.06            |
| CG5840                  | Proline-5-carboxylate reductase            | Hemocytes, (Tomancak et al., 2002)                      | 1.96            |
| CG4829                  | Acyltransferase                            | Hemocytes, (Tomancak et al., 2002)                      | 1.53            |
| CG8222 (Pvr)            | VEGF receptor                              | Hemocytes, (Heino et al., 2001)                         | 1.7             |
| CG12070 (sap-r)         | Sphingolipid activator                     | Hemocytes, (Freeman et al., 2003)                       | 1.56            |
| CG13388 (Akap200)       | Protein kinase A binding                   | Hemocytes, (Freeman et al., 2003)                       | 1.69            |
| CG10120 (men)           | Malic enzyme                               | Hemocytes, (Tomancak et al., 2002)                      | 1.65            |
| CG4559 (Idgf3)          | Chitinase                                  | Hemocytes, (Irving et al., 2005)                        | 1.71            |
| CG1787 (Hexo2)          | Hexosaminidase B                           | Hemocytes, (Tomancak et al., 2002)                      | 1.48            |
| CG6199                  | Procollagen lysine dioxygenase             | Hemocytes, this work                                    | 2.3             |
| CG11051 (Nplp2)         | Neuropeptide                               | Hemocytes, (Tomancak et al., 2002)                      | 1.89            |
| CG6736                  | Insulin like peptide                       | Hemocytes, (Tomancak et al., 2002)                      | 3.67            |
| CG7449 (hbs)            | Immunoglobulin family member               | Hemocytes, (Artero et al., 2006)                        | 1.73            |
| CG9148 (scf)            | Topoisomerase                              | Hemocytes, (Irving et al., 2005)                        | 1.57            |
| CG8501                  | Unknown                                    | Hemocytes, (Irving et al., 2005)                        | 6.12            |
| CG18446                 | Unknown                                    | Hemocytes, (Tomancak et al., 2002)                      | 2.1             |
| CG5854                  | Unknown                                    | Hemocytes, (Tomancak et al., 2002)                      | 2.1             |
| CG15695                 | Unknown                                    | Hemocytes, (Tomancak et al., 2002)                      | 1.68            |
| CG14629                 | Unknown                                    | Hemocytes, (Tomancak et al., 2002)                      | 1.71            |
| CG8776                  | Unknown                                    | Hemocytes, (Tomancak et al., 2002)                      | 1.64            |
| CG31431                 | Unknown                                    | Hemocytes, (Tomancak et al., 2002)                      | 1.63            |
| CG31337                 | Unknown                                    | Hemocytes, (Tomancak et al., 2002)                      | 3.3             |
| CG1092                  | Unknown                                    | Hemocytes, (Tomancak et al., 2002)                      | 3.75            |
| CG4139 (Karl)           | Unknown                                    | Hemocytes, (Irving et al., 2005; Tomancak et al., 2002) | 3.55            |
| CG16876                 | Unknown                                    | Hemocytes, (Tomancak et al., 2002)                      | 3.3             |

## References

- Abrams, E.W. and Andrew, D.J. (2002) Prolyl 4-hydroxylase alpha-related proteins in *Drosophila melanogaster*: tissue-specific embryonic expression of the 99F8-9 cluster. *Mech Dev*, 112, 165-171.
- Artero, R.D., Monferrer, L., Garcia-Lopez, A. and Baylies, M.K. (2006) Serpent and a hibris reporter are co-expressed in migrating cells during *Drosophila* hematopoiesis and Malpighian tubule formation. *Hereditas*, 143, 117-122.
- Franc, N.C., Dimarcq, J.L., Lagueux, M., Hoffmann, J. and Ezekowitz, R.A. (1996) Croquemort, a novel *Drosophila* hemocyte/macrophage receptor that recognizes apoptotic cells. *Immunity*, 4, 431-443.
- Freeman, M.R., Delrow, J., Kim, J., Johnson, E. and Doe, C.Q. (2003) Unwrapping glial biology: Gcm target genes regulating glial development, diversification, and function. *Neuron*, 38, 567-580.
- Heino, T.I., Karpanen, T., Wahlstrom, G., Pulkkinen, M., Eriksson, U., Alitalo, K. and Roos, C. (2001) The *Drosophila* VEGF receptor homolog is expressed in hemocytes. *Mech Dev*, 109, 69-77.
- Irving, P., Ubeda, J.M., Doucet, D., Troxler, L., Lagueux, M., Zachary, D., Hoffmann, J.A., Hetru, C. and Meister, M. (2005) New insights into *Drosophila* larval haemocyte functions through genome-wide analysis. *Cell Microbiol*, 7, 335-350.
- Kambris, Z., Hoffmann, J.A., Imler, J.L. and Capovilla, M. (2002) Tissue and stage-specific expression of the Tolls in *Drosophila* embryos. *Gene Expr Patterns*, 2, 311-317.
- Kramerova, I.A., Kawaguchi, N., Fessler, L.I., Nelson, R.E., Chen, Y., Kramerov, A.A., Kusche-Gullberg, M., Kramer, J.M., Ackley, B.D., Sieron, A.L., Prockop, D.J. and Fessler, J.H. (2000) Papilin in development; a pericellular protein with a homology to the ADAMTS metalloproteinases. *Development*, 127, 5475-5485.
- Milchanowski, A.B., Henkenius, A.L., Narayanan, M., Hartenstein, V. and Banerjee, U. (2004) Identification and characterization of genes involved in embryonic crystal cell formation during *Drosophila* hematopoiesis. *Genetics*, 168, 325-339.
- Tomancak, P., Beaton, A., Weiszmam, R., Kwan, E., Shu, S., Lewis, S.E., Richards, S., Ashburner, M., Hartenstein, V., Celniker, S.E. and Rubin, G.M. (2002) Systematic determination of patterns of gene expression during *Drosophila* embryogenesis. *Genome Biol*, 3, RESEARCH0088.

Table 2. Genes enriched  $\geq 1.5$  fold in the WT/*srp* unwounded microarray comparison with a suggested role in hemocyte function or immunity in larval or adult animals.

| Gene              | Function                            |                                                                                                                                         | Fold Difference |
|-------------------|-------------------------------------|-----------------------------------------------------------------------------------------------------------------------------------------|-----------------|
| CG5896 (Grass)    | Serine protease                     | Required for Toll activation (Kambris et al., 2006)                                                                                     | 2.13            |
| CG1395 (stg)      | Tyrosine phosphatase                | Mutants have reduced numbers of plasmatocytes and crystal cells (Milchanowski et al., 2004)                                             | 2.1             |
| CG9441 (Pu)       | Melanization                        | Increased during infection (De Gregorio et al., 2001)                                                                                   | 1.75            |
| CG8502            | Cuticle protein                     | Clot protein (Karlsson et al., 2004)                                                                                                    | 3.96            |
| CG7966            | Selenium binding                    | Hemolymph protein, released by infection (Vierstraete et al., 2003; Vierstraete et al., 2004)                                           | 1.92            |
| CG8913 (irc)      | Peroxidase                          | Increased by infection, (De Gregorio et al., 2001; De Gregorio et al., 2002)                                                            | 1.66            |
| CG2227 (Gip)      | isomerase                           | Hemolymph protein, clot protein, released by infection (de Morais Guedes et al., 2005; Karlsson et al., 2004; Vierstraete et al., 2004) | 2.03            |
| CG8586            | Serine protease                     | Clot protein, (Karlsson et al., 2004)                                                                                                   | 2.22            |
| CG31313           | Cysteine protease inhibitor         | Hemolymph protein (Vierstraete et al., 2003)                                                                                            | 2.55            |
| CG7390 (Smp-30)   | Calcium binding                     | Released during infection (Vierstraete et al., 2004)                                                                                    | 7.69            |
| CG6449 (ninA)     | Unknown                             | Increased by infection, (Boutros et al., 2002)                                                                                          | 1.94            |
| CG2060 (Cyp4e2)   | Cytochrome                          | Decreased by infection (De Gregorio et al., 2002)                                                                                       | 2.0             |
| CG4120 (Cyp12c1)  | Cytochrome                          | Increased during infection (Vodovar et al., 2005)                                                                                       | 12.2            |
| CG10833 (Cyp28d1) | Cytochrome                          | Decreased by infection, (De Gregorio et al., 2002)                                                                                      | 1.7             |
| CG6891            | Actin binding                       | Hemolymph protein (Guedes Sde et al., 2003)                                                                                             | 1.79            |
| CG8846 (thor)     | Translation initiation              | Increased by infection (Bernal and Kimbrell, 2000; De Gregorio et al., 2002)                                                            | 1.52            |
| CG1851 (Ady43A)   | Adenosine kinase                    | Increased by infection (De Gregorio et al., 2002)                                                                                       | 1.54            |
| CG7322            | Xylulose reductase                  | Decreased by infection (De Gregorio et al., 2002)                                                                                       | 1.54            |
| CG7592 (Obp99b)   | Odorant binding protein             | Hemolymph protein, (Vierstraete et al., 2003)                                                                                           | 2.93            |
| CG2852            | peptidyl-prolyl cis-trans isomerase | Clot protein, (Karlsson et al., 2004)                                                                                                   | 1.69            |
| CG1982 (Sodh-1)   | Sorbitol dehydrogenase              | Decreased by infection, (De Gregorio et al., 2002)                                                                                      | 1.77            |
| CG8157            | Unknown                             | Increased by infection, (De Gregorio et al., 2001; De Gregorio et al., 2002)                                                            | 3.8             |
| CG4306            | Unknown                             | Hemolymph protein, released by infection, clot protein (Karlsson et al., 2004; Vierstraete et al., 2003; Vierstraete et al., 2004)      | 1.51            |
| CG8160            | Unknown                             | Clot protein (Karlsson et al., 2004)                                                                                                    | 7.74            |
| CG5154 (Idgf5)    | Chitinase                           | Clot protein (Karlsson et al., 2004)                                                                                                    | 1.75            |
| CG1106 (gel)      | Cytoskeletal protein                | Clot protein (Karlsson et al., 2004)                                                                                                    | 1.53            |
| CG11064 (RfaBp)   | Fatty acid binding protein          | Clot protein, immune responsive (Scherfer et al., 2004; Vierstraete et al., 2004)                                                       | 2.67            |
| CG14526           | Nepriylsin activity                 | Clot protein, (Karlsson et al., 2004)                                                                                                   | 1.98            |
| CG1548            | Cathepsin D                         | Clot protein, immune responsive, (Karlsson et al., 2004; Vierstraete et al., 2003; Vierstraete et al., 2004)                            | 1.56            |
| CG18730 (Amy-p)   | Amylase                             | Clot protein, (Karlsson et al., 2004)                                                                                                   | 3.54            |

## References

- Bernal, A. and Kimbrell, D.A. (2000) Drosophila Thor participates in host immune defense and connects a translational regulator with innate immunity. *Proc Natl Acad Sci U S A*, 97, 6019-6024.
- Boutros, M., Agaisse, H. and Perrimon, N. (2002) Sequential activation of signaling pathways during innate immune responses in Drosophila. *Dev Cell*, 3, 711-722.
- De Gregorio, E., Spellman, P.T., Rubin, G.M. and Lemaitre, B. (2001) Genome-wide analysis of the Drosophila immune response by using oligonucleotide microarrays. *Proc Natl Acad Sci U S A*, 98, 12590-12595.
- De Gregorio, E., Spellman, P.T., Tzou, P., Rubin, G.M. and Lemaitre, B. (2002) The Toll and Imd pathways are the major regulators of the immune response in Drosophila. *Embo J*, 21, 2568-2579.
- de Moraes Guedes, S., Vitorino, R., Domingues, R., Tomer, K., Correia, A.J., Amado, F. and Domingues, P. (2005) Proteomics of immune-challenged Drosophila melanogaster larvae hemolymph. *Biochem Biophys Res Commun*, 328, 106-115.
- Guedes Sde, M., Vitorino, R., Tomer, K., Domingues, M.R., Correia, A.J., Amado, F. and Domingues, P. (2003) Drosophila melanogaster larval hemolymph protein mapping. *Biochem Biophys Res Commun*, 312, 545-554.
- Kambris, Z., Brun, S., Jang, I.H., Nam, H.J., Romeo, Y., Takahashi, K., Lee, W.J., Ueda, R. and Lemaitre, B. (2006) Drosophila immunity: a large-scale in vivo RNAi screen identifies five serine proteases required for Toll activation. *Curr Biol*, 16, 808-813.
- Karlsson, C., Korayem, A.M., Scherfer, C., Loseva, O., Dushay, M.S. and Theopold, U. (2004) Proteomic analysis of the Drosophila larval hemolymph clot. *J Biol Chem*, 279, 52033-52041.
- Milchanowski, A.B., Henkenius, A.L., Narayanan, M., Hartenstein, V. and Banerjee, U. (2004) Identification and characterization of genes involved in embryonic crystal cell formation during Drosophila hematopoiesis. *Genetics*, 168, 325-339.
- Scherfer, C., Karlsson, C., Loseva, O., Bidla, G., Goto, A., Havemann, J., Dushay, M.S. and Theopold, U. (2004) Isolation and characterization of hemolymph clotting factors in Drosophila melanogaster by a pullout method. *Curr Biol*, 14, 625-629.
- Vierstraete, E., Cerstiaens, A., Baggerman, G., Van den Bergh, G., De Loof, A. and Schoofs, L. (2003) Proteomics in Drosophila melanogaster: first 2D database of larval hemolymph proteins. *Biochem Biophys Res Commun*, 304, 831-838.
- Vierstraete, E., Verleyen, P., Baggerman, G., D'Hertog, W., Van den Bergh, G., Arckens, L., De Loof, A. and Schoofs, L. (2004) A proteomic approach for the analysis of instantly released wound and immune proteins in Drosophila melanogaster hemolymph. *Proc Natl Acad Sci U S A*, 101, 470-475.
- Vodovar, N., Vinals, M., Liehl, P., Basset, A., Degrouard, J., Spellman, P., Boccard, F. and Lemaitre, B. (2005) Drosophila host defense after oral infection by an entomopathogenic Pseudomonas species. *Proc Natl Acad Sci U S A*, 102, 11414-11419.

Table 3. Full list of genes enriched 1.5 fold in the WT/*srp* microarray comparison.

| <u>EST</u> | <u>CG number</u> | <u>Gene</u> | <u>Fold</u> | <u>Function</u>                     |
|------------|------------------|-------------|-------------|-------------------------------------|
| GH04080    | CG5779           | black cells | 30.1        | monophenol monooxygenase            |
| RE41741    | CG31783          | ninaD       | 18.9        | scavenger receptor                  |
| GH07976    | CG8193           |             | 13.78       | monophenol monooxygenase            |
| GH20281    | CG4120           | Cyp12c1     | 12.2        | cytochrome                          |
| RE17477    | CG7390           | smp-30      | 9.35        | unknown                             |
| RE61589    | CG17109          |             | 8.25        | aminoacylase                        |
| SD10415    | CG6698           | NtR         | 7.5         | ion channel                         |
| RE20374    | CG6733           |             | 7.6         | aminoacylase                        |
| RH39220    | CG7390           | smp-30      | 7.6         | <i>Repeat</i>                       |
| RE23041    | CG8160           |             | 7.74        | unknown                             |
| RH51491    | CG9511           |             | 6.5         | unknown                             |
| SD09866    | CG2952           | Dox-A3      | 5.94        | monophenol monooxygenase            |
| GH14572    | CG11395          |             | 5.8         | unknown                             |
| GH03691    | CG13279          | Cyt-b5-r    | 5.8         | cytochrome                          |
| AT15352    | CG8100           |             | 5.67        | oxygen transporter                  |
| GH05059    | CG33103          | Ppn         | 5.24        | extracellular matrix                |
| GH05754    | CG10142          | Ance-5      | 5.32        | peptidyl-dipeptidase                |
| HL07915    | CG8501           |             | 6.12        | unknown                             |
| AT17667    | CG15177          |             | 4.71        | calmodulin binding                  |
| LD28132    | CG4500           |             | 4.44        | long-chain-fatty-acid-CoA ligase    |
| AT18611    | CG30148          |             | 4.48        | glucosidase                         |
| RE27042    | CG6736           | ILP4        | 4.32        | insulin like peptide                |
| LP02841    | CG9989           |             | 4.46        | unknown                             |
| RE39992    | CG9964           | Cyp309a1    | 4.31        | cytochrome                          |
| HL01082    | CG6953           | fat-spondin | 4.1         | serine type endopeptidase inhibitor |
| RE57663    | CG7272           |             | 4           | unknown                             |
| RH25462    | CG31775          |             | 4           | unknown                             |
| SD02276    | CG7144           |             | 3.86        | saccharopine dehydrogenase          |
| RE36666    | CG1092           |             | 4           | unknown                             |
| RE38252    | CG31775          |             | 3.93        | <i>Repeat</i>                       |
| LP07813    | CG8502           |             | 3.96        | cuticle protein                     |
| HL01082    | CG6953           | fat-spondin | 4           | <i>Repeat</i>                       |
| RE57663    | CG7272           |             | 4           | <i>Repeat</i>                       |
| RH25462    | CG31775          |             | 4           | <i>Repeat</i>                       |
| SD02276    | CG7144           |             | 3.86        | <i>Repeat</i>                       |
| RE36666    | CG1092           |             | 4           | <i>Repeat</i>                       |
| RE38252    | CG31775          |             | 3.93        | <i>Repeat</i>                       |
| LP07813    | CG8502           |             | 3.96        | <i>Repeat</i>                       |
| LP03565    | CG31775          |             | 3.8         | <i>Repeat</i>                       |
| GH04232    | CG5397           |             | 3.86        | acyltransferase                     |
| RE40129    | CG17524          | GstE3       | 3.64        | glutathione transferase             |
| HL02811    | CG1092           |             | 3.75        | <i>Repeat</i>                       |
| AT09807    | CG17110          |             | 3.79        | aminoacylase                        |
| RE27042    | CG6736           | llp4        | 3.67        | <i>Repeat</i>                       |
| GH01984    | CG8782           | Oat         | 3.51        | ornithine aminotransferase          |

|         |         |          |      |                                         |
|---------|---------|----------|------|-----------------------------------------|
| GH10266 | CG18730 | Amy-p    | 3.54 | amylase,                                |
| RE08605 | CG11124 | sPLA2    | 3.54 | phospholipase                           |
| RE29678 | CG14572 |          | 3.5  | unknown                                 |
| RH45971 | CG16876 |          | 3.31 | unknown                                 |
| LD04267 | CG10240 | Cyp6a22  | 3.45 | cytochrome                              |
| GH05558 | CG10248 | Cyp6a8   | 3.38 | cytochrome                              |
| RE07473 | CG8157  |          | 3.8  | unknown                                 |
| SD07475 | CG4139  | Karl     | 3.55 | unknown                                 |
| SD10674 | CG32158 |          | 3.35 | adenylate cyclase                       |
| RE33721 | CG16876 |          | 3.21 | <i>Repeat</i>                           |
| GH18946 | CG12002 | Pxn      | 3.32 | extracellular matrix                    |
| AT13609 | CG17005 |          | 3.45 | unknown                                 |
| RE40816 | CG31337 |          | 3.3  | unknown                                 |
| LP09580 | CG9092  | Gal      | 3.3  | beta galactosidase                      |
| LP08165 | CG32697 | Meg2     | 3.15 | tyrosine phosphatase                    |
| RE12569 | CG10924 |          | 3.1  | phosphoenolpyruvate carboxykinase       |
| RE54324 | CG8196  | Ance-4   | 3.31 | peptidyl-dipeptidase                    |
| RE66124 | CG31300 |          | 3.25 | unknown                                 |
| HL07928 | CG14523 |          | 3.04 | metalloendopeptidase,                   |
| GH06606 | CG14768 |          | 3.1  | unknown                                 |
| AT09365 | CG32158 |          | 3    | <i>Repeat</i>                           |
| GH01616 | CG3481  | Adh      | 3.53 | alcohol dehydrogenase                   |
| LP08348 | CG4139  | Karl     | 3.58 | <i>Repeat</i>                           |
| AT13581 | CG17330 | jhamt    | 3.23 | juvenile hormone acid methyltransferase |
| RE71324 | CG14528 |          | 3    | metalloendopeptidase,                   |
| RH38644 | CG11797 | Obp56a   | 2.93 | odorant binding protein                 |
| SD01663 | CG9280  | Glit     | 2.95 | extracellular matrix                    |
| LD44791 | CG3767  | Jhl-26   | 2.88 | unknown                                 |
| RE46170 | CG11797 | Obp56a   | 2.8  | <i>Repeat</i>                           |
| AT17959 | CG15128 |          | 3.12 | unknown                                 |
| LP06572 | CG7592  | Obp99b   | 2.93 | odorant binding protein                 |
| RE64786 | CG10621 |          | 2.69 | selenocysteine methyltransferase        |
| LP11313 | CG4381  | GstD3    | 2.8  | glutathione transferase                 |
| GH04104 | CG17977 |          | 2.72 | unknown                                 |
| LD44491 | CG10391 | Cyp310a1 | 2.7  | cytochrome                              |
| LP06655 | CG4650  |          | 2.78 | serine type peptidase                   |
| GM02002 | CG17941 | ds       | 2.58 | protocadherin                           |
| RH34107 | CG3999  |          | 2.55 | glycine dehydrogenase                   |
| AT19440 | CG8234  |          | 2.52 | glucose transporter                     |
| GH22765 | CG8960  |          | 2.65 | unknown                                 |
| LP11945 | CG11064 | RfaBp    | 2.67 | Dehydrololichyl diphosphate synthase    |
| RH02566 | CG31313 |          | 2.55 | cysteine protease inhibitor             |
| LP03341 | CG30035 |          | 2.5  | glucose transporter                     |
| RH74240 | CG31084 |          | 2.59 | unknown                                 |
| LD12611 | CG33099 |          | 2.56 | giberellin 20 oxidase                   |
| GH18004 | CG11064 | RfaBp    | 2.42 | <i>Repeat</i>                           |
| GH23891 | CG9780  |          | 2.5  | unknown                                 |
| RH43577 | CG31313 |          | 2.46 | <i>Repeat</i>                           |
| GH26796 | CG11466 | Cyp9f2   | 2.54 | cytochrome                              |

|         |         |              |      |                                  |
|---------|---------|--------------|------|----------------------------------|
| RE67583 | CG33126 | NLaz         | 2.46 | Apolipoprotein D precursor       |
| HL01428 | CG4145  | Cg25C        | 2.47 | extracellular matrix             |
| SD17927 | CG7857  |              | 2.42 | unknown                          |
| SD27960 | CG1718  |              | 2.44 | ABC transporter                  |
| RE36278 | CG18111 | Obp99a       | 2.4  | odorant binding protein          |
| LD33453 | CG1031  | &alpha;-Est1 | 2.41 | carboxylesterase                 |
| GH01304 | CG3380  | Oatp58Dc     | 2.38 | anion transporter                |
| RH04286 | CG30035 |              | 2.38 | <i>Repeat</i>                    |
| RE57452 | CG2560  |              | 2.42 | cuticle protein                  |
| GH02222 | CG8586  |              | 2.24 | serine type peptidase            |
| LP10895 | CG3505  |              | 2.28 | serine type peptidase            |
| SD07234 | CG12002 | Pxn          | 2.42 | <i>Repeat</i>                    |
| LD33804 | CG1812  |              | 2.31 | actin binding                    |
| RH53041 | CG30035 |              | 2.33 | <i>Repeat</i>                    |
| RE70889 | CG11512 | GstD4        | 2.32 | glutathione transferase          |
| LP04569 | CG4734  |              | 2.29 | unknown                          |
| LD37702 | CG6199  |              | 2.3  | procollagen-lysine 5-dioxygenase |
| GH10694 | CG5621  |              | 2.3  | glutamate gated ion channel      |
| RE26342 | CG5958  |              | 2.23 | retinal binding                  |
| RE54280 | CG7771  | sim          | 2.24 | transcription factor             |
| GH21655 | CG6331  | Orct         | 2.12 | cation transporter               |
| RH09887 | CG7584  | Obp99c       | 2.18 | odorant binding protein          |
| GM14009 | CG4501  | bgm          | 2.22 | long-chain-fatty-acid-CoA ligase |
| GH11223 | CG33120 |              | 2.22 | unknown                          |
| AT21495 | CG18559 | Cyp309a2     | 2.23 | cytochrome                       |
| RH70762 | CG18111 | Obp99a       | 2.19 | <i>Repeat</i>                    |
| RH61984 | CG5896  |              | 2.17 | serine type peptidase            |
| RH23455 | CG2065  |              | 2.23 | oxidoreductase                   |
| GM13686 | CG4466  | Hsp27        | 2.15 | heat shock protein               |
| AT20211 | CG10516 |              | 2.15 | unknown                          |
| RE13542 | CG7408  |              | 2.2  | acetylgalactosamine 4 sulfatase  |
| RE69679 | CG17523 | GstE2        | 2.22 | glutathione transferase          |
| RH04868 | CG5896  |              | 2.13 | <i>Repeat</i>                    |
| LD04004 | CG17531 | GstE7        | 2.22 | glutathione transferase          |
| RE59626 | CG10005 |              | 2.18 | unknown                          |
| GH05619 | CG31150 |              | 2.17 | lipid transporter                |
| RH01692 | CG6870  |              | 2.3  | oxidoreductase                   |
| GH02921 | CG1102  |              | 2.17 | serine type peptidase            |
| RE06354 | CG17875 | cyp9f3psi    | 2.17 | cytochrome                       |
| LD11379 | CG4183  | Hsp26        | 2.15 | heat shock protein               |
| AT29766 | CG8197  |              | 2.14 | unknown                          |
| LP02895 | CG32475 | mthl8        | 2.18 | G-protein coupled receptor       |
| LD41905 | CG12505 |              | 2.09 | unknown                          |
| LD34564 | CG3502  |              | 2.15 | aminopeptidase                   |
| RE07893 | CG7584  | Obp99c       | 2.05 | <i>Repeat</i>                    |
| HL08109 | CG4600  | yip2         | 2.03 | acetyl-CoA C-acyltransferase     |
| RE06388 | CG32194 |              | 2.16 | unknown                          |
| GH28017 | CG4821  | Tequila      | 2.12 | serine type peptidase            |
| SD07266 | CG15009 | ImpL2        | 2.1  | unknown                          |

|         |         |              |      |                                          |
|---------|---------|--------------|------|------------------------------------------|
| LD47579 | CG1395  | stg          | 2.1  | tyrosine phosphatase                     |
| GH13950 | CG1112  | &alpha;-Est7 | 2    | carboxylesterase                         |
| HL08006 | CG3989  | ade5         | 2    | phosphoribosylaminoimidazole carboxylase |
| RE04259 | CG16993 | in           | 2    | protein binding                          |
| RE29544 | CG18088 |              | 2.1  | unknown                                  |
| RE47989 | CG18446 |              | 2.1  | unknown                                  |
| RE03018 | CG13003 |              | 2.13 | unknown                                  |
| RE56714 | CG14855 |              | 2    | carbohydrate transporter                 |
| RE14575 | CG2227  | Gip          | 2    | isomerase                                |
| AT17811 | CG10026 |              | 2.1  | retinal binding                          |
| RE12242 | CG6113  |              | 2    | triacylglycerol lipase                   |
| RE48339 | CG4779  | hgo          | 1.94 | homogentisate 1,2-dioxygenase            |
| LD23561 | CG5854  |              | 2.1  | unknown                                  |
| RH01575 | CG6870  |              | 2.1  | <i>Repeat</i>                            |
| LD28571 | CG3880  |              | 1.9  | unknown                                  |
| RE58687 | CG5840  |              | 1.95 | pyrroline-5-carboxylate reductase        |
| RE38359 | CG7663  |              | 2    | cuticle protein                          |
| GH07188 | CG14526 |              | 1.98 | endothelin converting enzyme             |
| LD22157 | CG2060  | Cyp4e2       | 2    | cytochrome                               |
| GH03003 | CG18249 |              | 1.95 | receptor                                 |
| GH08902 | CG32444 |              | 1.99 | aldose 1 epimerase                       |
| LP10725 | CG9196  |              | 1.95 | unknown                                  |
| AT02541 | CG10026 |              | 2    | <i>Repeat</i>                            |
| LD15094 | CG15828 |              | 1.98 | apolipoprotein B                         |
| RE10280 | CG12154 | oc           | 1.99 | transcription factor                     |
| HL08079 | CG7399  | Hn           | 1.94 | phenylalanine hydroxylase                |
| RE62767 | CG5840  |              | 1.96 | <i>Repeat</i>                            |
| HL01444 | CG16882 |              | 1.95 | unknown                                  |
| RE36442 | CG9360  |              | 1.94 | Dehydrogenase/reductase                  |
| LD44305 | CG8223  |              | 1.92 | unknown                                  |
| GH09241 | CG6126  |              | 1.93 | carbohydrate transporter                 |
| AT22836 | CG31055 |              | 1.93 | unknown                                  |
| GH24077 | CG7529  |              | 1.94 | carboxylesterase                         |
| RE67917 | CG10467 |              | 1.94 | aldose 1 epimerase                       |
| RE36442 | CG9360  |              | 1.92 | <i>Repeat</i>                            |
| RE57443 | CG6449  | ninA         | 1.94 | adhesion protein                         |
| GH14316 | CG7966  |              | 1.92 | Selenium-binding protein                 |
| LD40495 | CG5384  |              | 1.9  | ubiquitin protease                       |
| LD26105 | CG10591 |              | 1.87 | unknown                                  |
| RE03989 | CG6830  |              | 1.95 | unknown                                  |
| LP03218 | CG11406 |              | 1.92 | triacylglycerol lipase                   |
| GH13461 | CG9364  | Treh         | 1.91 | trehalase                                |
| SD01502 | CG9342  |              | 1.9  | Microsomal triglyceride transfer protein |
| LD08638 | CG16928 | mre11        | 1.88 | endonuclease                             |
| AT21585 | CG3568  |              | 1.94 | unknown                                  |
| RE04770 | CG9184  |              | 1.89 | unknown                                  |
| RE28849 | CG6834  |              | 1.91 | unknown                                  |
| LD44179 | CG4229  |              | 1.9  | unknown                                  |
| RH17287 | CG9360  |              | 1.99 | <i>Repeat</i>                            |



|         |         |             |      |                                         |
|---------|---------|-------------|------|-----------------------------------------|
| RE52979 | CG6834  |             | 1.91 | <i>Repeat</i>                           |
| RH08410 | CG11051 | Nplp2       | 1.89 | neuropeptide like protein               |
| RE50726 | CG7382  |             | 1.93 | unknown                                 |
| HL01241 | CG8036  |             | 1.88 | transketolase                           |
| GH18690 | CG7995  |             | 1.86 | glycerol kinase                         |
| GH14865 | CG14021 |             | 1.86 | unknown                                 |
| GH07481 | CG3050  | Cyp6d5      | 1.89 | cytochrome                              |
| RE54320 | CG14110 |             | 1.84 | unknown                                 |
| RE70806 | CG7449  | hbs         | 1.87 | immunoglobulin family member            |
| SD15568 | CG1829  | Cyp6v1      | 1.91 | cytochrome                              |
| SD27327 | CG16880 |             | 1.86 | serine type peptidase                   |
| RH69794 | CG14990 |             | 1.85 | serine type peptidase                   |
| LP05421 | CG10764 |             | 1.87 | serine type peptidase                   |
| GH12581 | CG4475  | Idgf2       | 1.8  | chitinase                               |
| RH09802 | CG17534 | GstE9       | 1.83 | glutathione transferase                 |
| RH29237 | CG32687 |             | 1.85 | transmembrane receptor protein kinase   |
| GH21817 | CG5270  |             | 1.8  | unknown                                 |
| SD12357 | CG30187 |             | 1.9  | unknown                                 |
| GH16717 | CG7135  |             | 1.81 | unknown                                 |
| RH45818 | CG6378  | BM-40-SPARC | 1.71 | extracellular matrix                    |
| LP08941 | CG6891  |             | 1.79 | actin binding                           |
| LD29228 | CG12880 |             | 1.81 | unknown                                 |
| SD04011 | CG7122  | RhoGAP16F   | 1.75 | GTPase activator                        |
| HL02883 | CG1129  |             | 1.79 | mannose-1-phosphate guanylyltransferase |
| LD39479 | CG6875  | asp         | 1.75 | microtubule binding                     |
| GH18858 | CG14629 |             | 1.71 | unknown                                 |
| RE02070 | CG4280  | crq         | 1.82 | scavenger receptor                      |
| RE29447 | CG31002 |             | 1.74 | glucuronosyltransferase                 |
| RE70771 | CG7249  | Cyp6a16Psi  | 1.78 | cytochrome                              |
| LD06759 | CG4463  | Hsp23       | 1.78 | heat shock protein                      |
| SD13780 | CG4821  | Tequila     | 1.76 | <i>Repeat</i>                           |
| RE52036 | CG17117 | hth         | 1.66 | transcription factor                    |
| RE02548 | CG9460  |             | 1.74 | serine type endopeptidase inhibitor     |
| GH19226 | CG6385  |             | 1.69 | Sarcosine dehydrogenase                 |
| LD23613 | CG3510  | CycB        | 1.76 | cyclin                                  |
| SD15568 | CG1829  | Cyp6v1      | 1.8  | <i>Repeat</i>                           |
| RE70806 | CG7449  | hbs         | 1.73 | <i>Repeat</i>                           |
| SD09524 | CG9186  |             | 1.76 | unknown                                 |
| RE61294 | CG8112  |             | 1.71 | Sterol O-acyltransferase 1              |
| SD10928 | CG12013 | PHGPx       | 1.73 | peroxidase                              |
| RE18076 | CG12011 |             | 1.73 | unknown                                 |
| LP05865 | CG5656  |             | 1.71 | alkaline phosphatase                    |
| RE60364 | CG3973  |             | 1.74 | GAS2-like protein 1                     |
| LP12301 | CG1982  | Sodh-1      | 1.77 | Sorbitol dehydrogenase                  |
| GH07453 | CG4559  | Idgf3       | 1.71 | chitinase                               |
| RE64430 | CG5814  | CycB3       | 1.72 | cyclin                                  |
| GH12410 | CG5154  | Idgf5       | 1.75 | chitinase                               |
| RH68724 | CG32695 |             | 1.82 | unknown                                 |
| RE50843 | CG2852  |             | 1.69 | peptidyl-prolyl cis-trans isomerase     |

|         |         |              |      |                                         |
|---------|---------|--------------|------|-----------------------------------------|
| GH06693 | CG9547  |              | 1.69 | glutaryl-CoA dehydrogenase              |
| AT01837 | CG31795 | ia2          | 1.72 | tyrosine phosphatase                    |
| LD37787 | CG9441  | Pu           | 1.75 | GTP cyclohydrolase                      |
| RE14803 | CG17045 | yellow-e3    | 1.73 | unknown                                 |
| RE32110 | CG6738  |              | 1.78 | metallopeptidase                        |
| GH02773 | CG3200  | Reg-2        | 1.68 | rhythmically expressed gene             |
| RE24825 | CG1121  | &alpha;-Est8 | 1.75 | carboxylesterase                        |
| RE01946 | CG10073 |              | 1.74 | unknown                                 |
| RH63796 | CG3246  |              | 1.64 | unknown                                 |
| RE21725 | CG11680 | mle          | 1.69 | helicase                                |
| GH15894 | CG2736  |              | 1.71 | scavenger receptor                      |
| SD07907 | CG30046 |              | 1.74 | serine peptidase inhibitor              |
| RE55084 | CG14029 | vri          | 1.72 | transcription factor                    |
| GM06581 | CG12389 | Fpps         | 1.72 | acyltransferase                         |
| CK00536 | CG33115 |              | 1.7  | wnt binding                             |
| LD18634 | CG13906 | nerfin-1     | 1.72 | transcription factor                    |
| RE46882 | CG6934  |              | 1.79 | unknown                                 |
| GM04010 | CG4145  | Cg25C        | 1.79 | <i>Repeat</i>                           |
| RE29477 | CG7005  | Esp          | 1.65 | sulfate transporter                     |
| LD41231 | CG11451 |              | 1.72 | unknown                                 |
| LD21785 | CG5295  |              | 1.69 | phospholipase                           |
| GH22460 | CG10833 | Cyp28d1      | 1.71 | cytochrome                              |
| RE27241 | CG6965  | mthl5        | 1.69 | G-protein coupled receptor              |
| RE29005 | CG14029 | vri          | 1.7  | Repeat                                  |
| RE59557 | CG15736 | Chrac-16     | 1.71 | Chromatin accessibility complex protein |
| LP02734 | CG13388 | Akap200      | 1.69 | protein kinase A binding                |
| RE64050 | CG14856 |              | 1.72 | carbohydrate transporter                |
| SD03187 | CG8222  | Pvr          | 1.7  | Vegf receptor                           |
| GH07626 | CG3523  |              | 1.66 | Fatty acid synthase                     |
| RE22593 | CG7231  |              | 1.71 | unknown                                 |
| RH02901 | CG3246  |              | 1.62 | <i>Repeat</i>                           |
| RE18426 | CG11086 |              | 1.68 | Gadd45                                  |
| SD17036 | CG4821  | Tequila      | 1.65 | <i>Repeat</i>                           |
| LP08717 | CG6821  | Lsp1&gamma   | 1.67 | oxygen transporter                      |
| AT19280 | CG31160 |              | 1.65 | transcription factor                    |
| LD14127 | CG18600 |              | 1.68 | unknown                                 |
| GH11385 | CG8913  | irc          | 1.66 | peroxidase                              |
| GH05218 | CG9629  |              | 1.68 | aldehyde dehydrogenase                  |
| SD03066 | CG13868 |              | 1.66 | unknown                                 |
| RE49494 | CG1129  |              | 1.67 | <i>Repeat</i>                           |
| LD27718 | CG10120 | Men          | 1.65 | malic enzyme                            |
| GH23407 | CG33115 |              | 1.61 | <i>Repeat</i>                           |
| LD26833 | CG7725  | rogdi        | 1.68 | unknown                                 |
| RE66796 | CG13183 |              | 1.67 | unknown                                 |
| LD46862 | CG7099  |              | 1.68 | transcription factor                    |
| LD42037 | CG8420  |              | 1.6  | unknown                                 |
| RE26721 | CG15695 |              | 1.68 | unknown                                 |
| SD07027 | CG4822  |              | 1.67 | ion channel                             |
| SD08865 | CG8776  |              | 1.64 | carbon monoxide oxygenase               |

|                |                |                          |             |                                          |
|----------------|----------------|--------------------------|-------------|------------------------------------------|
| RE15818        | CG15717        |                          | 1.6         | unknown                                  |
| <b>RE52884</b> | <b>CG12389</b> | <b>Fpps</b>              | <b>1.64</b> | <b>Repeat</b>                            |
| RE17418        | CG4147         | Hsc70-3                  | 1.62        | heat shock protein                       |
| RE20610        | CG15717        |                          | 1.6         | Repeat                                   |
| AT14673        | CG2112         |                          | 1.69        | unknown                                  |
| <b>RE47547</b> | <b>CG31431</b> |                          | <b>1.63</b> | <b>FGF type receptor</b>                 |
| GH13458        | CG7021         | Ela                      | 1.62        | extracellular matrix                     |
| LP03989        | CG3767         | jhi-26                   | 1.61        | Repeat                                   |
| GH22837        | CG7802         |                          | 1.61        | unknown                                  |
| RH68451        | CG7607         |                          | 1.66        | immunoglobulin family member             |
| LD04789        | CG7372         |                          | 1.67        | transcription factor                     |
| <b>LP04931</b> | <b>CG11335</b> | <b>lox</b>               | <b>1.63</b> | <b>lysyl oxidase</b>                     |
| SD08921        | CG7627         |                          | 1.6         | transporter                              |
| GH10767        | CG10374        | Lsd-1                    | 1.63        | lipid storage droplet                    |
| RE38335        | CG32150        |                          | 1.58        | unknown                                  |
| AT15782        | CG30183        |                          | 1.61        | unknown                                  |
| RE73548        | CG12885        |                          | 1.7         | unknown                                  |
| RE72980        | CG8696         | LvpH                     | 1.61        | alpha glucosidase                        |
| GH21228        | CG11325        | GRHR                     | 1.56        | G-protein coupled receptor               |
| LP04345        | CG6234         |                          | 1.6         | unknown                                  |
| LD32311        | CG18783        | Kr-h1                    | 1.57        | transcription factor                     |
| GM21394        | CG6612         | Adk3                     | 1.64        | Adenylate kinase                         |
| <b>LD07917</b> | <b>CG1637</b>  |                          | <b>1.59</b> | <b>acid phosphatase</b>                  |
| LD43740        | CG31217        |                          | 1.58        | scavenger receptor                       |
| SD06318        | CG1553         |                          | 1.59        | unknown                                  |
| <b>GH03720</b> | <b>CG5490</b>  | <b>TI</b>                | <b>1.63</b> | <b>toll receptor</b>                     |
| RH17678        | CG11680        | mle                      | 1.59        | Repeat                                   |
| <b>SD07085</b> | <b>CG1548</b>  | <b>cathD</b>             | <b>1.56</b> | <b>cathepsin</b>                         |
| RH48308        | CG8947         | 26-29-p                  | 1.59        | cathepsin                                |
| LD45245        | CG5961         |                          | 1.57        | F-box only protein 9                     |
| <b>SD05564</b> | <b>CG31022</b> | <b>PH4&amp;alpha;EFB</b> | <b>1.56</b> | <b>procollagen-proline 4-dioxygenase</b> |
| GH23732        | CG31543        | Hph                      | 1.58        | peptidyl-proline 4-dioxygenase           |
| SD08136        | CG13610        | Orct2                    | 1.56        | cation transporter                       |
| <b>AT04963</b> | <b>CG9148</b>  | <b>scf</b>               | <b>1.57</b> | <b>DNA topoisomerase</b>                 |
| LD09343        | CG4089         |                          | 1.58        | unknown                                  |
| LD19710        | CG3352         | ft                       | 1.61        | protocadherin                            |
| SD22308        | CG15209        |                          | 1.64        | unknown                                  |
| GM03781        | CG31886        |                          | 1.62        | unknown                                  |
| GH03186        | CG6446         | Sema-1b                  | 1.59        | semaphorin                               |
| AT16405        | CG13991        |                          | 1.71        | serine type peptidase                    |
| SD04227        | CG33957        | akap450                  | 1.55        | cytoskeleton                             |
| GH03980        | CG10658        | Os9                      | 1.55        | unknown                                  |
| SD05742        | CG7144         |                          | 1.56        | Repeat                                   |
| <b>LD17738</b> | <b>CG12070</b> | <b>Sap-r</b>             | <b>1.56</b> | <b>Sphingolipid activator</b>            |
| <b>LD35474</b> | <b>CG5992</b>  | <b>Adgf-A</b>            | <b>1.55</b> | <b>adenosine deaminase</b>               |
| SD09912        | CG12428        |                          | 1.57        | acetyltransferase                        |
| LP01188        | CG12104        |                          | 1.58        | unknown                                  |
| SD03094        | CG9311         |                          | 1.56        | tyrosine phosphatase                     |
| GH07959        | CG7227         |                          | 1.57        | scavenger receptor                       |

|                |                |               |             |                                               |
|----------------|----------------|---------------|-------------|-----------------------------------------------|
| RH61817        | CG13024        |               | 1.67        | unknown                                       |
| AT29350        | CG5103         |               | 1.57        | unknown                                       |
| LD46221        | CG10916        |               | 1.56        | unknown                                       |
| <b>RH57257</b> | <b>CG7322</b>  |               | <b>1.54</b> | <b>L-xylulose reductase</b>                   |
| AT01314        | CG13203        |               | 1.55        | unknown                                       |
| LP05579        | CG7758         | ppl           | 1.53        | Glycine cleavage system H protein             |
| RE67967        | CG13705        |               | 1.52        | unknown                                       |
| HL01706        | CG4675         | Ndae1         | 1.54        | bicarbonate transporter                       |
| RE59303        | CG31886        |               | 1.57        | <i>Repeat</i>                                 |
| SD02282        | CG1763         | nod           | 1.56        | microtubule binding                           |
| LD16270        | CG10719        | brat          | 1.54        | transcription factor                          |
| GH24669        | CG12800        | Cyp6d4        | 1.56        | cytochrome                                    |
| LP03649        | CG10719        | brat          | 1.55        | <i>Repeat</i>                                 |
| SD05646        | CG5105         | Plap          | 1.53        | Phospholipase A2 activator protein            |
| <b>SD02833</b> | <b>CG5748</b>  | <b>Hsf</b>    | <b>1.5</b>  | <b>transcription factor</b>                   |
| RH07954        | CG8175         | Mtk           | 1.56        | antimicrobial                                 |
| <b>GH12430</b> | <b>CG4829</b>  |               | <b>1.53</b> | <b>acyltransferase</b>                        |
| <b>GH13982</b> | <b>CG8983</b>  | <b>ERp60</b>  | <b>1.53</b> | <b>Protein disulfide-isomerase</b>            |
| GH14155        | CG4723         |               | 1.54        | endothelin converting enzyme                  |
| SD16537        | CG8002         | rictor        | 1.54        | actin regulator                               |
| <b>LD24387</b> | <b>CG10236</b> | <b>LanA</b>   | <b>1.52</b> | <b>Extracellular matrix</b>                   |
| RE62247        | CG12653        | btd           | 1.55        | transcription factor                          |
| LP01657        | CG33126        | NLaz          | 1.53        | <i>Repeat</i>                                 |
| GM14838        | CG3433         | Coprox        | 1.51        | coproporphyrinogen oxidase                    |
| GH26082        | CG18316        |               | 1.54        | unknown                                       |
| LD22570        | CG4590         | inx2          | 1.54        | innexin channel                               |
| RE09661        | CG13082        |               | 1.5         | unknown                                       |
| LD36616        | CG6394         | GalNAc-T2     | 1.51        | polypeptide N-acetylgalactosaminyltransferase |
| GM01838        | CG7748         | OstStt3       | 1.52        | oligosaccharyl transferase                    |
| GH12548        | CG11236        |               | 1.54        | protein kinase                                |
| SD04152        | CG1070         | Alh           | 1.51        | transcription factor                          |
| <b>RH63089</b> | <b>CG1787</b>  | <b>Hexo2</b>  | <b>1.5</b>  | <b>Hexosaminidase</b>                         |
| GH15081        | CG9467         |               | 1.54        | glyceraldehyde 3 phosphate dehydrogenase      |
| RE46166        | CG8795         |               | 1.54        | G-protein coupled receptor                    |
| SD05389        | CG4746         | mab-2         | 1.53        | unknown                                       |
| AT31672        | CG33340        |               | 1.59        | unknown                                       |
| RE69176        | CG12350        | &lambda;Try   | 1.54        | serine type peptidase                         |
| LD37855        | CG4978         | Mcm7          | 1.51        | DNA helicase                                  |
| <b>GM02629</b> | <b>CG1851</b>  | <b>Ady43A</b> | <b>1.54</b> | <b>adenosine kinase</b>                       |
| RE52007        | CG10923        | Klp67A        | 1.54        | microtubule motor                             |
| <b>SD07495</b> | <b>CG1106</b>  | <b>Gel</b>    | <b>1.53</b> | <b>actin binding</b>                          |
| <b>HL08053</b> | <b>CG8846</b>  | <b>Thor</b>   | <b>1.52</b> | <b>transcription factor</b>                   |
| LD18090        | CG12051        | Act42A        | 1.51        | cytoskeleton                                  |
| SD10603        | CG31689        |               | 1.55        | transporter                                   |
| RE37079        | CG6705         | tsl           | 1.52        | torso bindgin                                 |
| GH02581        | CG18104        | arg           | 1.5         | arginase                                      |
| RH47707        | CG6705         | tsl           | 1.52        | <i>Repeat</i>                                 |
| GH03305        | CG6287         |               | 1.5         | D-3-phosphoglycerate dehydrogenase            |
| LD29172        | CG11905        |               | 1.5         | unknown                                       |

|         |         |        |      |                                             |
|---------|---------|--------|------|---------------------------------------------|
| RE26329 | CG3069  | Taf10b | 1.5  | transcription factor                        |
| LD35174 | CG4293  |        | 1.5  | arginase                                    |
| LP01481 | CG3327  | E23    | 1.5  | transporter                                 |
| SD08787 | CG10578 | DnaJ-1 | 1.56 | heat shock protein                          |
| RH25118 | CG9148  | scf    | 1.5  | <i>Repeat</i>                               |
| LP03571 | CG13397 |        | 1.5  | alpha-N-acetylglucosaminidase               |
| LD34202 | CG1448  | inx3   | 1.5  | innexin channel                             |
| RE30433 | CG4306  |        | 1.5  | serine type peptidase                       |
| RE17417 | CG9372  |        | 1.52 | serine type peptidase                       |
| GH09006 | CG9279  |        | 1.5  | microtubule motor                           |
| LD24677 | CG5522  |        | 1.5  | guanyl-nucleotide exchange factor           |
| GM01519 | CG9248  |        | 1.52 | phospholipase                               |
| GH09240 | CG7870  |        | 1.5  | Dolichyl-phosphate beta-glucosyltransferase |
| RE02772 | CG11500 |        | 1.5  | signal peptidase                            |

|                                                                                   |                                    |
|-----------------------------------------------------------------------------------|------------------------------------|
|  | known hemocyte genes               |
|  | known crystal cell genes           |
|  | immune responsive or lymph protein |
|  | mutant with hemocyte defects       |
